# Supplementary material for: Late Diagnosis of Infants with PCD and Neonatal Respiratory Distress
Source: PubMed Central journal article supplement (PMC7563976; doi:10.3390/jcm9092871), 2020-09-04
Supplement: jcm-09-02871-s001.pdf [file jcm-09-02871-s001.pdf]

**Table S1.** Inclusion criteria for the total study population and for the subgroup of younger patients with definite PCD.

|                                             |                                                                                                                                                                                                                                                |
|---------------------------------------------|------------------------------------------------------------------------------------------------------------------------------------------------------------------------------------------------------------------------------------------------|
| <b>Total study population</b><br>(N = 1375) | <ul style="list-style-type: none"> <li>• Patients from centres that delivered data on neonatal period</li> <li>• Diagnosed in 2000-2019</li> <li>• All age groups</li> <li>• Definite, probable or clinical PCD diagnosis</li> </ul>           |
| <b>Subgroup analysis</b><br>(N = 476)       | <ul style="list-style-type: none"> <li>• Patients from centres that delivered data on neonatal period</li> <li>• Diagnosed in 2000-2019</li> <li>• 0-19 years old when neonatal history was taken</li> <li>• Definite PCD diagnosis</li> </ul> |

**Table S2.** Characteristics of PCD patients diagnosed after 2000 (N=1375).

| Characteristic                         | N (%)      | Age at Diagnosis<br>(in years) | N (%) of<br>Patients<br>Diagnosed at<br>0–12m |
|----------------------------------------|------------|--------------------------------|-----------------------------------------------|
|                                        |            | Median (IQR)                   |                                               |
| <b>Total</b>                           | 1375 (100) | 9.84 (3.92-16.26)              | 183 (13.3)                                    |
| <b>Sex</b>                             |            |                                |                                               |
| Male                                   | 692 (50.3) | 9.40 (2.87-15.72)              | 105 (15.2)                                    |
| Female                                 | 683 (49.7) | 10.35 (4.83-16.76)             | 77 (11.3)                                     |
| <b>Country of residence</b>            |            |                                |                                               |
| Argentina                              | 101 (7.3)  | 6.00 (2.00-13.00)              | 14 (13.9)                                     |
| Australia                              | 43 (3.1)   | 8.30 (1.26-20.62)              | 10 (23.3)                                     |
| Colombia                               | 11 (0.8)   | 6.61 (4.04-8.34)               | 1 (9.1)                                       |
| Cyprus                                 | 42 (3.1)   | 21.02 (10.25-43.25)            | 4 (9.5)                                       |
| Czech Republic                         | 51 (3.7)   | 9.71 (4.37-14.38)              | 6 (11.8)                                      |
| Italy                                  | 303 (22.0) | 9.27 (4.20-20.03)              | 50 (16.5)                                     |
| Norway                                 | 35 (2.5)   | 1.42 (0.24-9.77)               | 16 (45.7)                                     |
| Turkey                                 | 276 (20.1) | 11.83 (8.26-15.61)             | 10 (3.6)                                      |
| United Kingdom                         | 513 (37.3) | 9.40 (2.69-817.34)             | 71 (13.8)                                     |
| <b>NRD</b>                             |            |                                |                                               |
| No                                     | 688 (50.0) | 10.95 (5.96-16.85)             | 51 (7.4)                                      |
| Yes                                    | 622 (45.2) | 8.10 (1.62- 14.41)             | 128 (20.6)                                    |
| No information                         | 65 (4.7)   | 13.45 (4.07-34.20)             | 3 (4.6)                                       |
| <b>Organ laterality</b>                |            |                                |                                               |
| Situs solitus                          | 761 (55.3) | 11.84 (7.00-17.53)             | 44 (5.8)                                      |
| Laterality defect                      | 580 (42.2) | 6.35 (1.11-13.63)              | 134 (17.6)                                    |
| No information                         | 34 (2.5)   | 8.82 (2.44-15.63)              | 4 (11.8)                                      |
| <b>Clinical characteristics groups</b> |            |                                |                                               |
| No NRD, situs solitus                  | 480 (34.9) | 12.44 (7.64-17.96)             | 17 (3.5)                                      |
| NRD, situs solitus                     | 344 (25.0) | 10.35 (4.88-17.14)             | 32 (9.3)                                      |
| No NRD, laterality defect              | 252 (18.3) | 8.77 (3.30-15.81)              | 36 (14.3)                                     |
| NRD, laterality defect                 | 305 (22.2) | 4.46 (0.5-12.39)               | 97 (31.8)                                     |

NRD: neonatal respiratory distress.

**Table S3.** Age at diagnosis of PCD patients of all ages, per clinical characteristics group, based on reported NRD and organ laterality (N=1375).

| Clinical characteristics<br>groups | Age at diagnosis N (%) |       |      |      |        |       | TOTAL |
|------------------------------------|------------------------|-------|------|------|--------|-------|-------|
|                                    | 0–3m                   | 3–12m | 1–4y | 5–9y | 10–14y | > 14y |       |

|                                  |           |           |            |            |            |            |            |
|----------------------------------|-----------|-----------|------------|------------|------------|------------|------------|
| <b>No NRD, situs solitus</b>     | 4 (0.8)   | 13 (2.7)  | 41 (8.6)   | 95 (19.9)  | 120 (25.2) | 204 (42.8) | 477 (100)  |
| <b>NRD, situs solitus</b>        | 10 (2.9)  | 22 (6.4)  | 38 (11.1)  | 75 (21.9)  | 81 (23.7)  | 116 (33.9) | 342 (100)  |
| <b>No NRD, laterality defect</b> | 8 (3.2)   | 28 (11.1) | 32 (12.7)  | 61 (24.2)  | 50 (19.8)  | 73 (29.0)  | 252 (100)  |
| <b>NRD, laterality defect</b>    | 43 (14.1) | 54 (17.8) | 51 (16.8)  | 52 (17.1)  | 46 (15.1)  | 58 (19.1)  | 304 (100)  |
| <b>TOTAL</b>                     | 65 (4.7)  | 117 (8.5) | 162 (11.8) | 283 (20.6) | 297 (21.6) | 451 (32.8) | 1375 (100) |

NRD: neonatal respiratory distress, m: months, yrs: years.

Age 0–2 months corresponds to 0–2.999 months, similar for all age groups.

**Table S4.** Prevalence of NRD and laterality defects in PCD patients aged 0-19 years with definite PCD diagnosis by country (N=476).

| Country        | Neonatal presentation |           |         | Laterality defects |           |         |
|----------------|-----------------------|-----------|---------|--------------------|-----------|---------|
|                | No NRD                | NRD       | Unknown | SS                 | LD        | Unknown |
| Argentina      | 8 (27%)               | 22 (73%)  | 0 (0%)  | 5 (17%)            | 25 (83%)  | 0 (0%)  |
| Australia      | 6 (32%)               | 13 (68%)  | 0 (0%)  | 5 (26%)            | 14 (74%)  | 0 (0%)  |
| Colombia       | 11 (100%)             | 0 (0%)    | 0 (0%)  | 10 (91%)           | 1 (9%)    | 0 (0%)  |
| Cyprus         | 0 (0%)                | 5 (100%)  | 0 (0%)  | 1 (20%)            | 4 (80%)   | 0 (0%)  |
| Czech Republic | 14 (67%)              | 6 (29%)   | 1 (5%)  | 15 (71%)           | 6 (29%)   | 0 (0%)  |
| Italy          | 54 (61%)              | 35 (39%)  | 0 (0%)  | 38 (43%)           | 51 (57%)  | 0 (0%)  |
| Norway         | 4 (16%)               | 20 (80%)  | 1 (4%)  | 8 (32%)            | 17 (68%)  | 0 (0%)  |
| Turkey         | 12 (39%)              | 19 (61%)  | 0 (0%)  | 19 (61%)           | 12 (39%)  | 0 (0%)  |
| United Kingdom | 84 (34%)              | 141 (58%) | 20 (8%) | 117 (48%)          | 110 (45%) | 18 (7%) |
| <b>TOTAL</b>   | 193 (45%)             | 261 (5%)  | 22 (5%) | 218 (46%)          | 240 (50%) | 18 (4%) |

NRD: neonatal respiratory distress, SS: situs solitus, LD: laterality defect.

Information presented as N (%).
